# Supplementary material
Source: PubMed Central journal article supplement (PMC3418718)

**A)****C1q**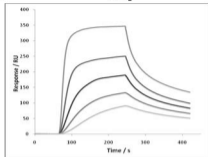**B)****gC1q**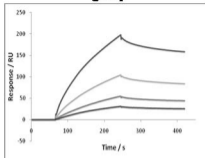**C)****gC1qR**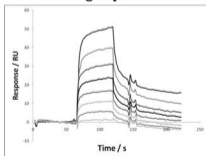**Supplemental figure 1.**

Supplement: supp_blood-2011-07-369728_blood-2011-07-369728-1.pdf [file supp_blood-2011-07-369728_blood-2011-07-369728-1.pdf]
